# Supplementary material for: Systematic review and meta-analysis of nasal potential difference in hypoxia-induced lung injury
Source: PubMed Central journal article supplement (PMC4973263; doi:10.1038/srep30780), 2016-08-04
Supplement: srep30780-s1.pdf [file srep30780-s1.pdf]

# **Systematic review and meta-analysis of nasal potential difference in hypoxia-induced lung injury**

Zhenlei Su, Lili Zhu, Jing Wu, Runzhen Zhao, Hong-Long Ji

**Supplementary Table 1.** Data for analyzing correlations with altitude or SpO<sub>2</sub>. ENaC, epithelial sodium channels; SpO<sub>2</sub>, blood oxygen saturation level; CFTR, cystic fibrosis transmembrane conductance regulator. \* calculated from the correlation of altitude and SpO<sub>2</sub>.

| Study             | SpO <sub>2</sub> (%) | Altitude (m) | Basal NPD (mV) | ENaC NPD (mV) | AR NPD (mV) | CFTR NPD (mV) |
|-------------------|----------------------|--------------|----------------|---------------|-------------|---------------|
| Betz T 2015       | 71.6*                | 4559         | 20.2           | 6.6           | 13.6        | 23.3          |
| Betz T 2015       | 71.6*                | 4559         | 18.2           | 5.7           | 12.5        | 29.4          |
| Betz T 2015       | 71.6*                | 4559         | 15.5           | 4.6           | 10.9        | 26.1          |
| Kaskinen AK 2016  | 95.0                 |              | 17.0           | 9.7           | 5.9         |               |
| Kaskinen AK 2016  | 90.3                 |              | 13.7           | 6.6           | 5.9         |               |
| Kaskinen AK 2016  | 80.0                 |              | 12.1           | 4.4           | 6.9         |               |
| Maggiorini M 2006 | 96.0*                | 490          | 20.0           | 8.7           | 11.3        |               |
| Maggiorini M 2006 | 71.6*                | 4559         | 8.8            | 4.1           | 4.3         |               |
| Maggiorini M 2006 | 96.0*                | 490          | 14.6           | 5.9           | 8.4         |               |
| Maggiorini M 2006 | 71.6*                | 4559         | 2.9            | 0.9           | 1.9         |               |
| Maggiorini M 2006 | 96*                  | 490          | 16.9           | 6.5           | 10.4        |               |
| Maggiorini M 2006 | 71.6*                | 4559         | 4.8            | 1.9           | 2.9         |               |
| Mairbäurl H 2003  | 97.1                 | 490          | 14.4           | 6.4           | 8.7         | 13            |
| Mairbäurl H 2003  | 62.9                 | 4559         | 27.5           | 3.3           | 24.7        | 38            |
| Mairbäurl H 2003  | 59.5                 | 4559         | 47.0           | 2.7           | 45.5        | 21.1          |
| Mairbäurl H 2003  | 94.9                 | 490          | 21             | 8.1           | 13.6        | 14.8          |
| Mairbäurl H 2003  | 77.1                 | 4559         | 31.1           | 2             | 29.2        | 32.6          |
| Mairbäurl H 2003  | 79.2                 | 4559         | 68.9           | 1.1           | 68.1        | 25.3          |
| Mairbäurl H 2003  | 98.3*                | 105          | 17.2           | 3.5           |             | 12.3          |
| Mairbäurl H 2003  | 72.0*                | 4500         | 21.0           | 3.9           |             | 14.2          |
| Peth S 2006       | 99.1                 |              | 17.5           |               |             |               |
| Peth S 2006       | 80.4                 |              | 15.2           |               |             |               |
| Peth S 2006       | 99.1                 |              | 17.5           |               |             |               |
| Peth S 2006       | 79.4                 |              | 20.5           |               |             |               |
| Sartori C 2002    | 95.5*                | 580          | 17.2           | 10            | 7.3         |               |
| Sartori C 2002    | 95.5*                | 580          | 25.4           | 15.3          | 10.1        |               |
| Sartori C 2002    | 95.5*                | 580          | 27.8           | 14.4          |             |               |
| Sartori C 2004    | 72.0                 | 4559         | 12.5           | 10.3          | 5.3         |               |
| Sartori C 2004    | 95.5*                | 580          | 18.0           | 10            | 8.3         |               |
| Sartori C 2004    | 79.0                 | 4559         | 22.9           | 12.8          | 8.2         |               |
| Sartori C 2004    | 95.5*                | 580          | 25.6           | 14.8          | 12          |               |

**Supplementary Table 2.** Data of healthy controls for analyzing correlations with basal NPD. ENaC, epithelial sodium channels; AR, amiloride-resistant; CFTR, cystic fibrosis transmembrane conductance regulator; N, the number of healthy controls.

| <b>Study</b>     | <b>Control (N)</b> | <b>Basal NPD (mV)</b> | <b>ENaC NPD (mV)</b> | <b>AR NPD (mV)</b> | <b>CFTR NPD (mV)</b> |
|------------------|--------------------|-----------------------|----------------------|--------------------|----------------------|
| Betz T 2015      | 14                 | 20.2                  | 6.6                  | 13.6               | 23.3                 |
| Betz T 2015      | 14                 | 18.2                  | 5.7                  | 12.5               | 29.4                 |
| Kaskinen AK 2016 | 44                 | 17                    | 9.7                  | 5.9                |                      |
| Kaskinen AK 2016 | 16                 | 13.7                  | 6.6                  | 5.9                |                      |
| Mairbäurl H 2003 | 12                 | 21                    | 8.1                  | 13.6               | 14.8                 |
| Mairbäurl H 2003 | 12                 | 31.1                  | 2                    | 29.2               | 32.6                 |
| Mairbäurl H 2003 | 12                 | 68.9                  | 1.1                  | 68.1               | 25.3                 |
| Mairbäurl H 2003 | 17                 | 17.2                  | 3.5                  |                    | 12.3                 |
| Mairbäurl H 2003 | 17                 | 21                    | 3.9                  |                    | 14.2                 |
| Peth S 2006      | 17                 | 17.5                  |                      |                    |                      |
| Peth S 2006      | 17                 | 15.2                  |                      |                    |                      |
| Peth S 2006      | 17                 | 17.5                  |                      |                    |                      |
| Peth S 2006      | 17                 | 20.5                  |                      |                    |                      |
| Sartori C 2002   | 33                 | 25.4                  | 15.3                 | 10.1               |                      |
| Sartori C 2004   | 29                 | 22.9                  | 12.8                 | 8.2                |                      |
| Sartori C 2004   | 29                 | 25.6                  | 14.8                 | 12                 |                      |
| Barker PM 1997   | 8                  | 22                    | 6.1                  |                    |                      |
| Eisenhut M 2006  | 8                  | 24.4                  | 15.1                 |                    |                      |
| Thome UH 2006    | 17                 | 11.6                  |                      | 7.1                |                      |
| Gaillard EA 2007 | 5                  | 24.8                  | 13                   |                    |                      |
| Gaillard EA 2007 | 9                  | 20                    | 12.3                 |                    |                      |
| Gaillard EA 2007 | 10                 | 21.8                  | 17.3                 |                    |                      |
| Gaillard EA 2007 | 10                 | 13.5                  | 10.5                 |                    |                      |

**Supplementary Table 3.** Data of ALI patients for analyzing correlations with basal NPD. ENaC, epithelial sodium channels; AR, amiloride-resistant; CFTR, cystic fibrosis transmembrane conductance regulator; N, the number of patients.

| <b>Study</b>      | <b>ALI (N)</b> | <b>Basal NPD (mV)</b> | <b>ENaC NPD (mV)</b> | <b>AR NPD (mV)</b> | <b>CFTR NPD (mV)</b> |
|-------------------|----------------|-----------------------|----------------------|--------------------|----------------------|
| Betz T 2015       | 14             | 15.5                  | 4.6                  | 10.9               | 26.1                 |
| Kaskinen AK 2016  | 39             | 12.1                  | 4.4                  | 6.9                |                      |
| Maggiorini M 2006 | 9              | 20                    | 8.7                  | 11.3               |                      |
| Maggiorini M 2006 | 9              | 8.8                   | 4.1                  | 4.3                |                      |
| Maggiorini M 2006 | 8              | 14.6                  | 5.9                  | 8.4                |                      |
| Maggiorini M 2006 | 8              | 2.9                   | 0.9                  | 1.9                |                      |
| Maggiorini M 2006 | 10             | 16.9                  | 6.5                  | 10.4               |                      |
| Maggiorini M 2006 | 10             | 4.8                   | 1.9                  | 2.9                |                      |
| Mairbäurl H 2003  | 10             | 14.4                  | 6.4                  | 8.7                | 13                   |
| Mairbäurl H 2003  | 10             | 27.5                  | 3.3                  | 24.7               | 38                   |
| Mairbäurl H 2003  | 10             | 47                    | 2.7                  | 45.5               | 21.1                 |
| Sartori C 2002    | 33             | 17.2                  | 10                   | 7.3                |                      |
| Sartori C 2002    | 7              | 27.8                  | 14.4                 |                    |                      |
| Sartori C 2004    | 21             | 12.5                  | 10.3                 | 5.3                |                      |
| Sartori C 2004    | 21             | 18                    | 10                   | 8.3                |                      |
| Barker PM 1997    | 21             | 16.5                  | 3.8                  |                    |                      |
| Barker PM 1997    | 11             | 19.5                  | 4.6                  |                    |                      |
| Barker PM 1997    | 12             | 21.5                  | 6.1                  |                    |                      |
| Eisenhut M 2006   | 4              | 19.25                 | 12.5                 |                    |                      |
| Thome UH 2006     | 12             | 9.4                   |                      | 5.2                |                      |
| Gaillard EA 2007  | 14             | 15.75                 | 9.5                  |                    |                      |
| Gaillard EA 2007  | 24             | 20.5                  | 14                   |                    |                      |
| Gaillard EA 2007  | 30             | 16                    | 15                   |                    |                      |
| Gaillard EA 2007  | 27             | 15                    | 11                   |                    |                      |
